# Supplementary material for: Cosolvent-promoted selective non-aqueous hydrolysis of PET wastes and facile product separation
Source: Royal Society of Chemistry journal article supplement (doi:10.1039/d2gc00328g), 2022-01-01
Supplement: d2gc00328g1.pdf [file d2gc00328g1.pdf]

## Supporting information

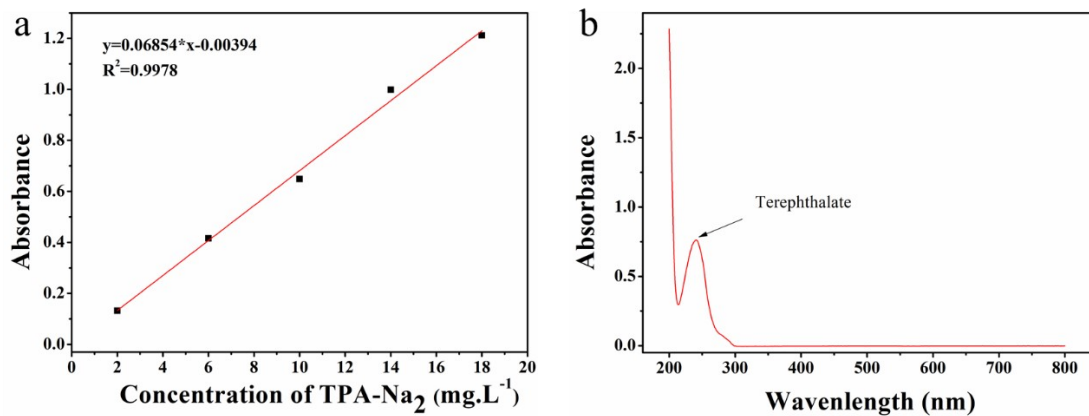

**Fig. S1** Standard curve of TPA-Na<sub>2</sub> (a), and UV-Vis absorption spectrum of recovered TPA-Na<sub>2</sub> (b) after treatment of TPA with sodium hydroxide according to the reported method. <sup>1</sup>

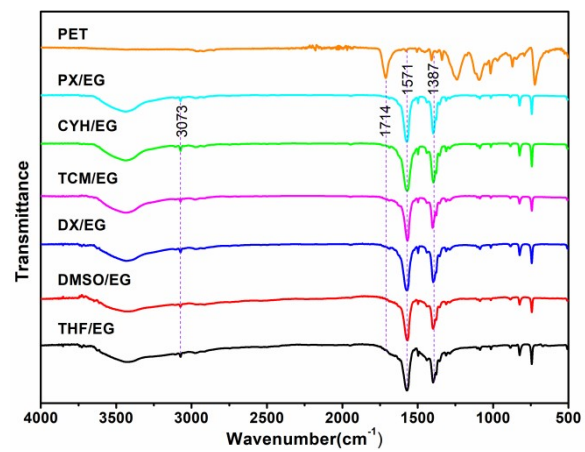

**Fig. S2** FTIR spectra of raw material PET, self-separated product in the presence of various cosolvents.

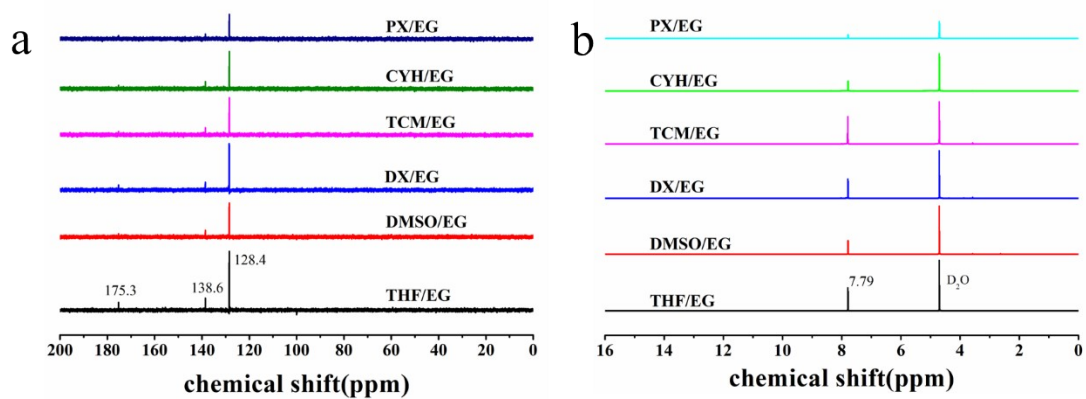

**Fig. S3**  $^{13}\text{C}$  NMR (a) and  $^1\text{H}$  NMR (b) of the self-separated product in the presence of various cosolvents.

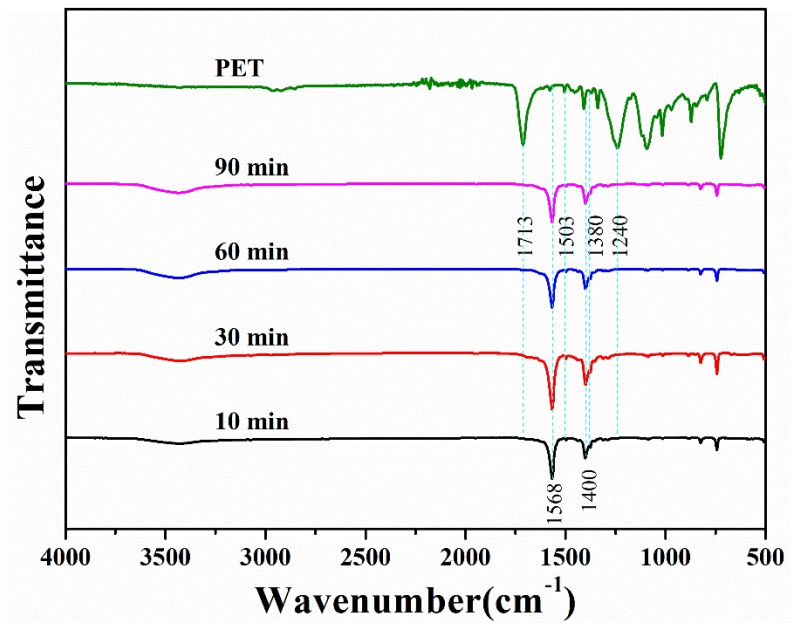

Fig. S4 FTIR spectra of self-separated product at different time.

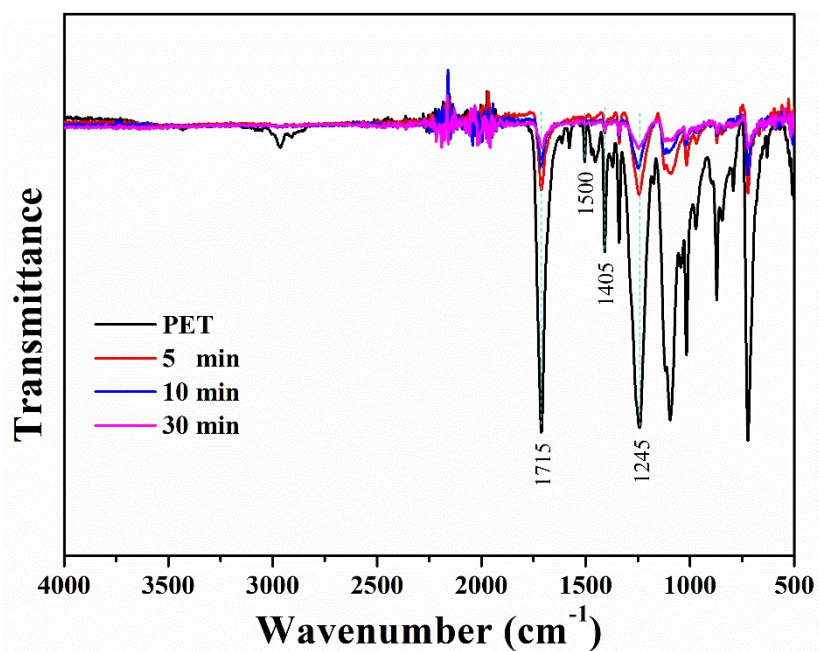

Fig. S5 FTIR spectra of unreacted PET residues at different time.

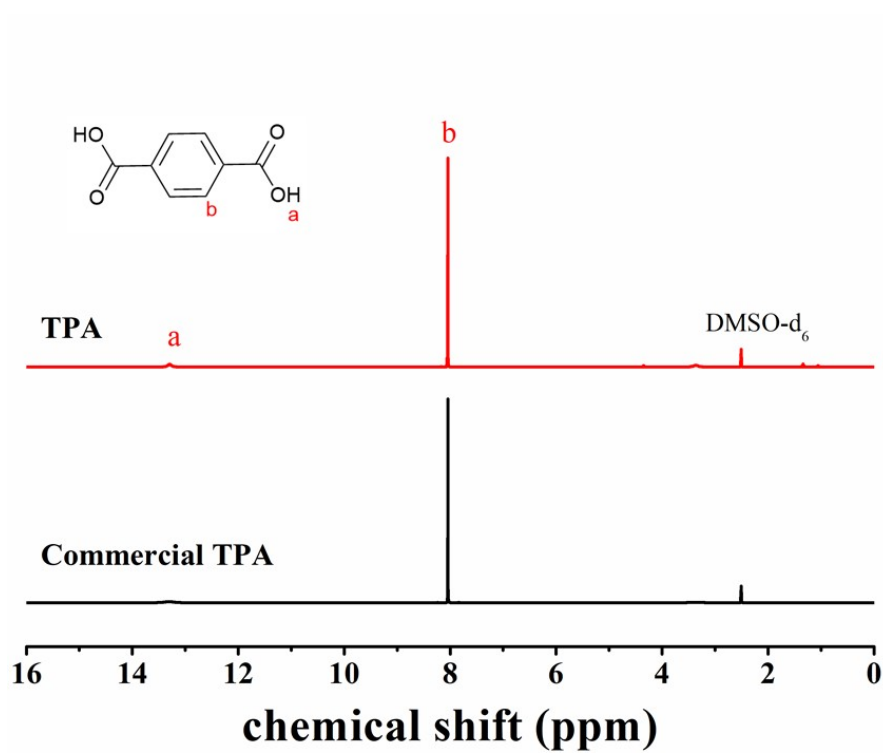

**Fig. S6** NMR spectrum of TPA compared to commercial TPA.

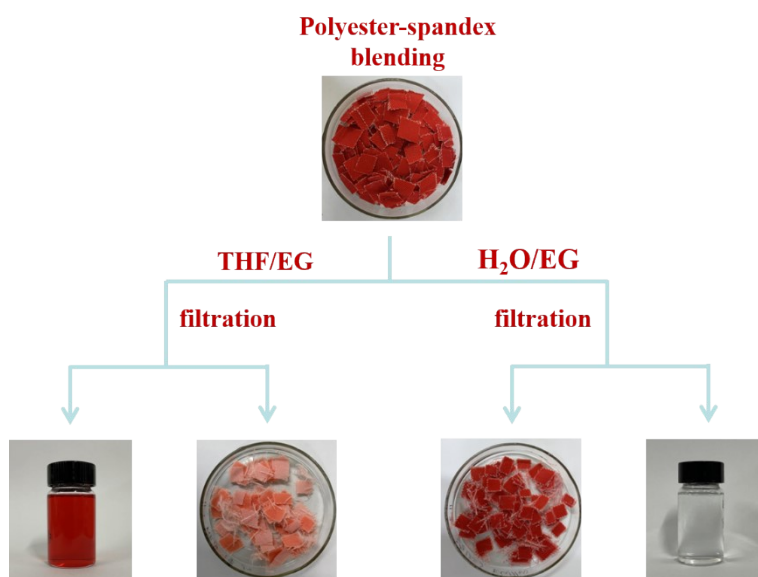

**Fig. S7** The elution effect of THF on waste textile dyes compared to water.

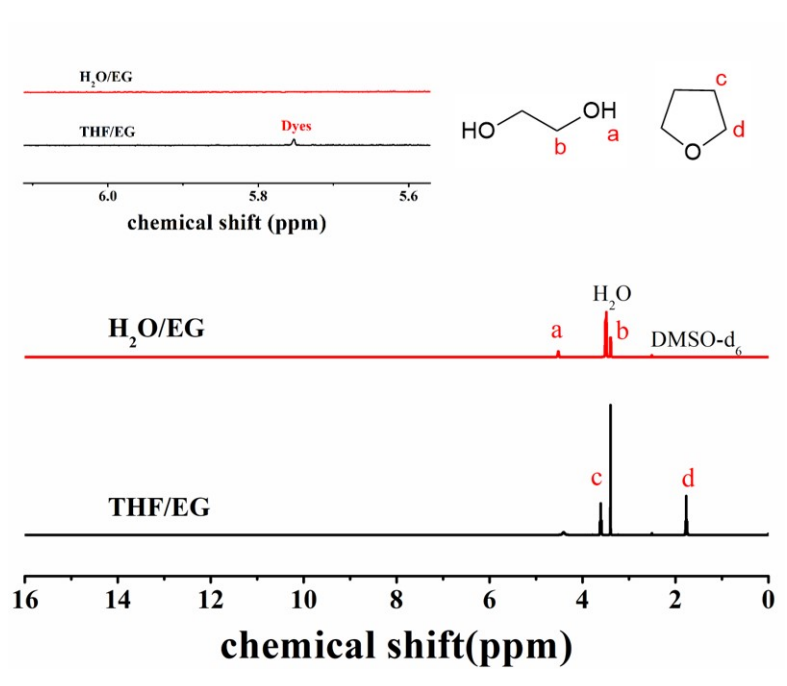

**Fig. S8**  $^1\text{H}$  NMR spectrum of the filtrate after THF/EG solution and  $\text{H}_2\text{O}/\text{EG}$  solution decolorized textiles, respectively.

#### References

1. S. A. Ravichandran, V. P. Rajan, P. V. Aravind, A. Seenivasan, D. G. Prakash and K. Ramakrishnan, *Macromolecular Symposia*, 2016, **361**, 30-33.
